# Supplementary figures and images for: Brown garlic: A nutritionally improved garlic with therapeutic value in asthma treatment via modulation of S-nitrosothiols
Source: PubMed Central journal article supplement — Heliyon. 2024 Aug 28;10(17):e36976. doi: 10.1016/j.heliyon.2024.e36976 (PMC11402760; doi:10.1016/j.heliyon.2024.e36976), 2024-08-28

**Figure. 4A**

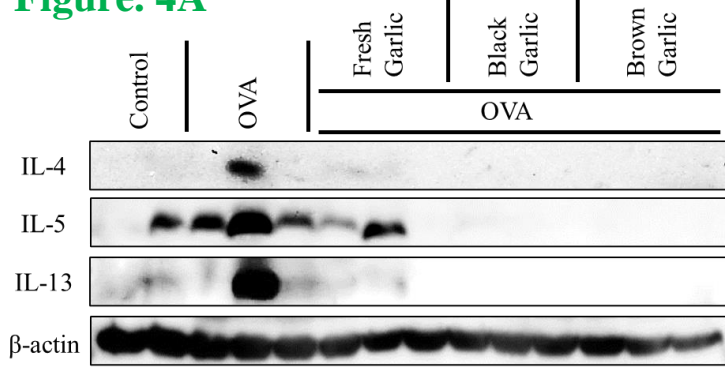

**Raw uncropped gel images**

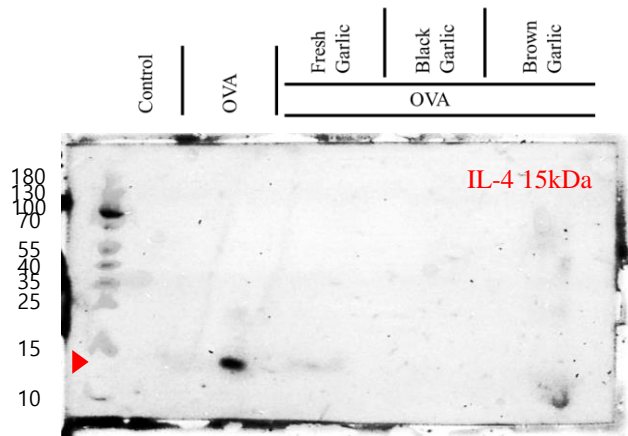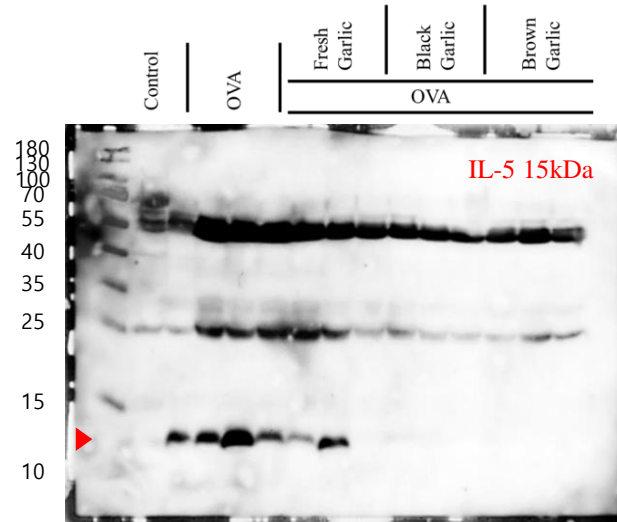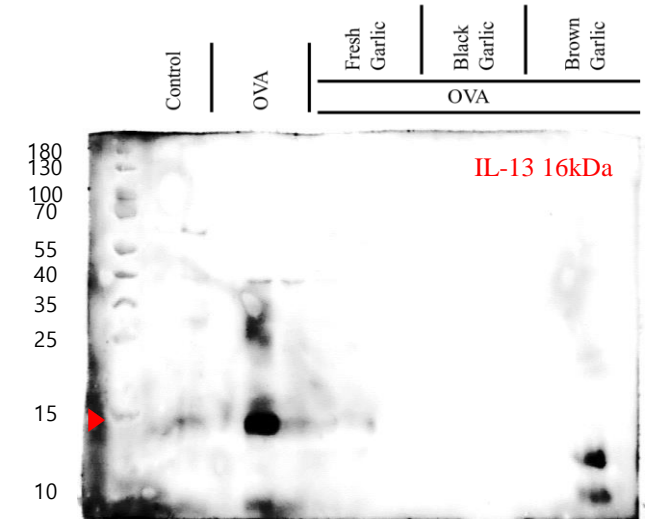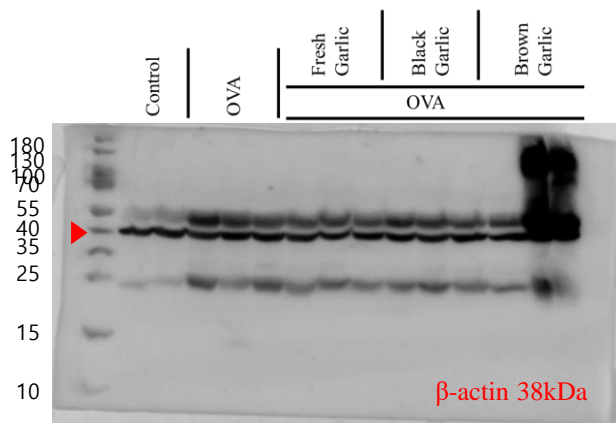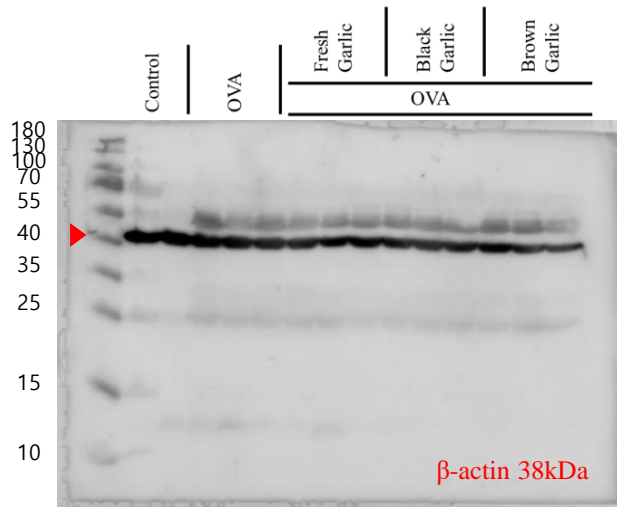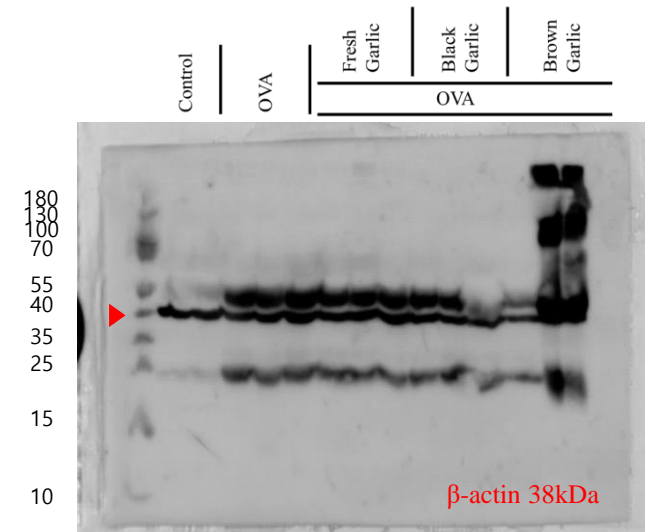

**Figure. 4B**

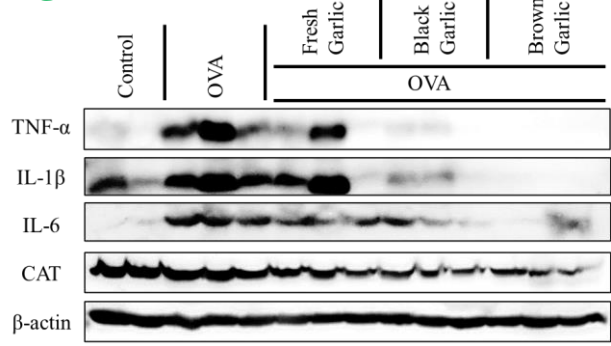

**Raw uncropped gel images**

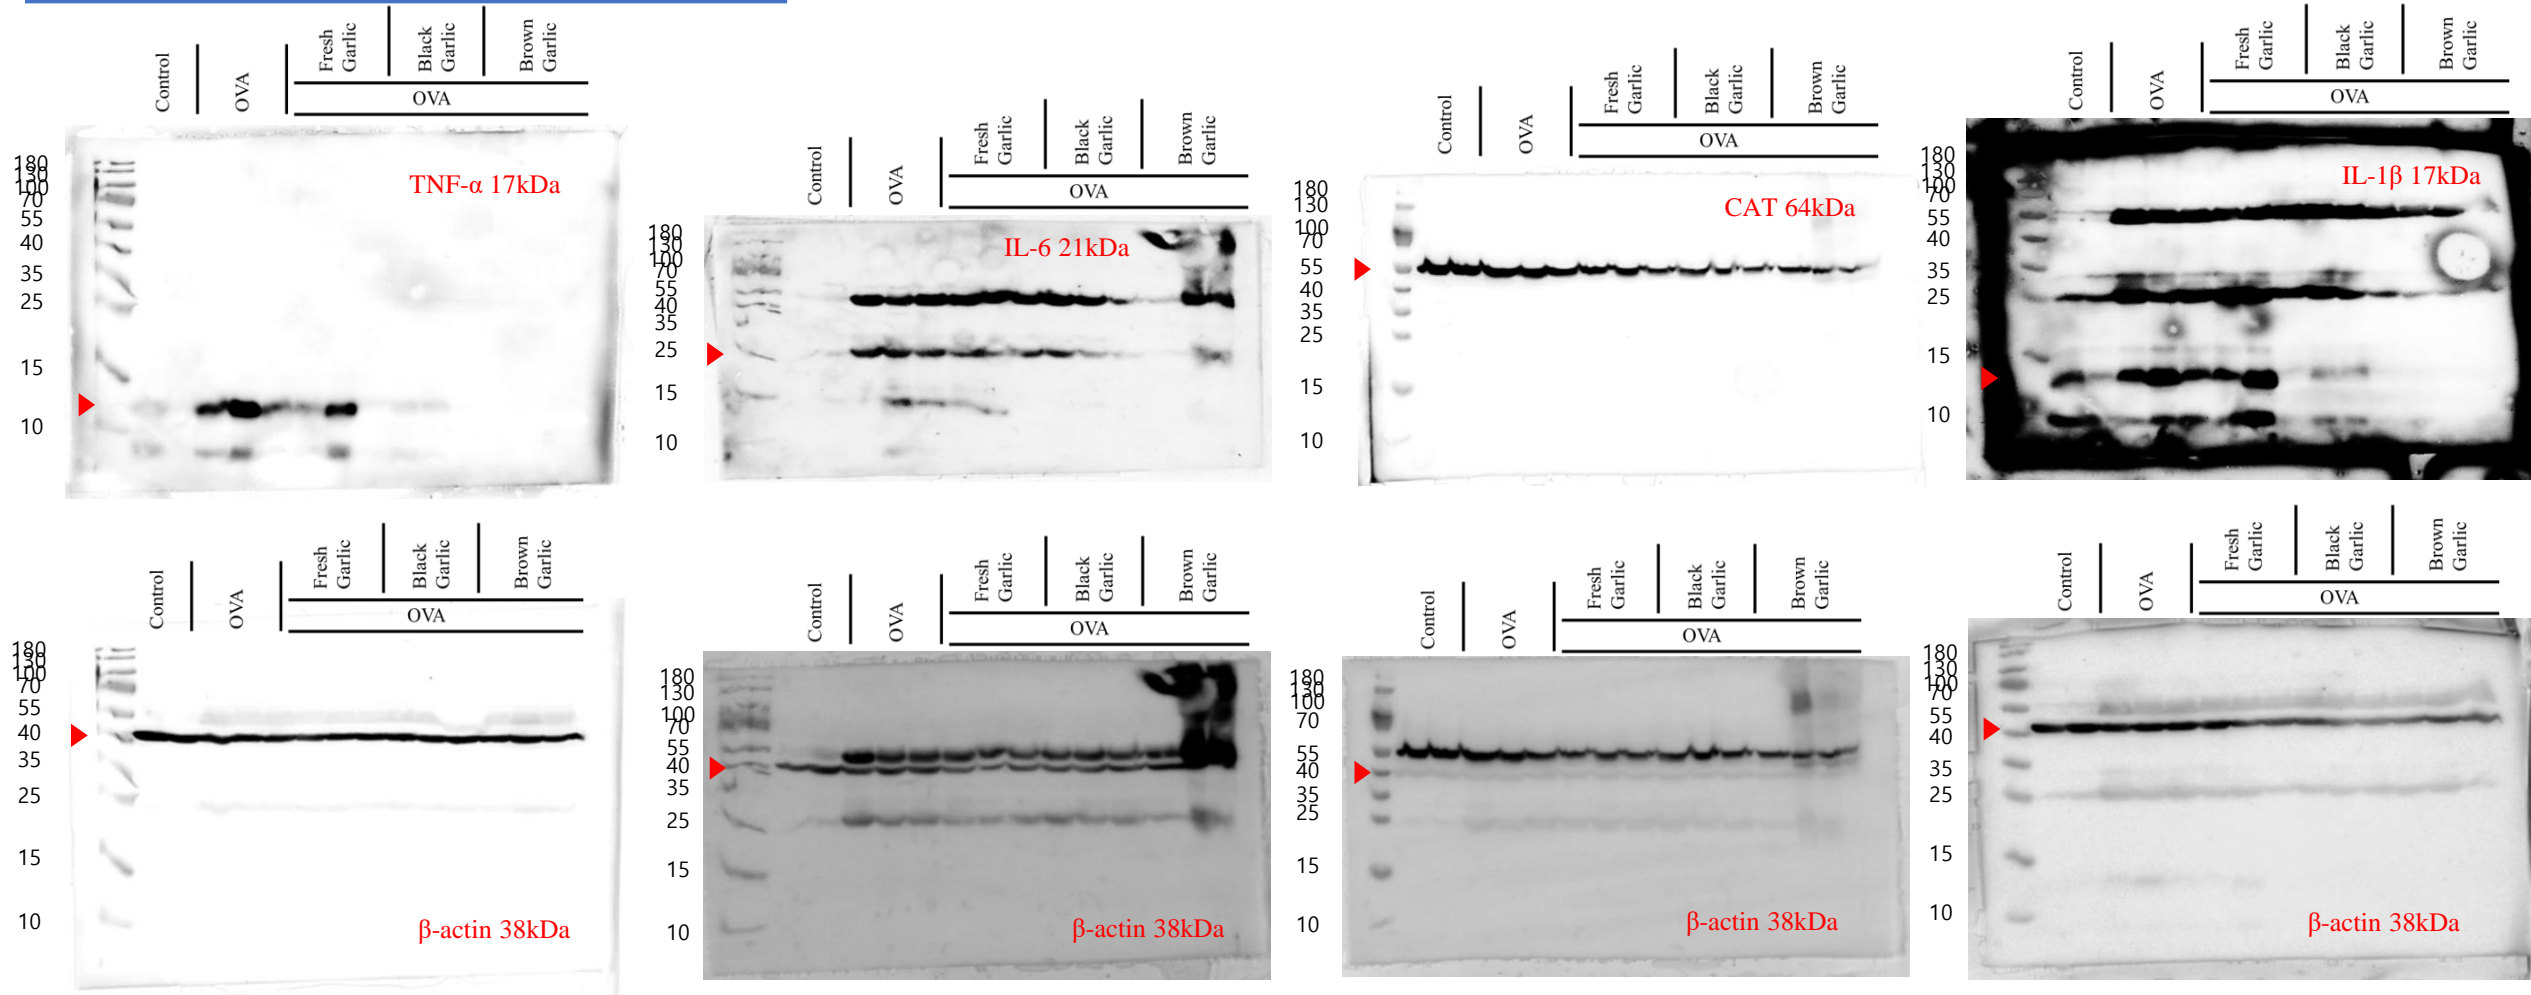

Supplement: mmc1.pdf [file mmc1.pdf]
